# Supplementary material for: Green and facile sol–gel synthesis of the mesoporous SiO2–TiO2catalyst by four different activation modes
Source: Royal Society of Chemistry journal article supplement (doi:10.1039/d0ra07569h), 2020-01-01

## Content

- 1.- Table 1** FTIR data of SiO<sub>2</sub>-TiO<sub>2</sub> catalyst, most important bands.
- 2.- Figure 1** FTIR of SiO<sub>2</sub>-TiO<sub>2</sub> for a) 1:4, b) 4:1 molar ratio catalyst obtained by MH, US, NIR and MW.
- 3.- Figure 2** Diffractograms of SiO<sub>2</sub>-TiO<sub>2</sub> for a) 1:1, b) 4:1 molar ratio catalyst.
- 4.- Table 2** Band gap energy values calculated from DRS-UV-vis spectra.
- 5.- Figure 3** Curves of Kubelka-Munk of SiO<sub>2</sub>-TiO<sub>2</sub> for a) 1:4, b) 4:1 molar ratio catalyst.
- 6.-** Determination of Band gap energy as function of Kubelka-Munk method.

1.-

**Table 1** FTIR data of SiO<sub>2</sub>-TiO<sub>2</sub> catalyst, most important bands

| Bonds   | Molar ratio SiO <sub>2</sub> -TiO <sub>2</sub> |           |           |           |
|---------|------------------------------------------------|-----------|-----------|-----------|
|         | 1:2                                            | 1:4       | 4:1       | 2:1       |
| Si-O-Si | 1043-1025                                      | 1021-1047 | 1060-1046 | 1064-1049 |
| Si-O-Si | 801-794                                        | 801-798   | 808-794   | 794-797   |
| Si-O-Ti | 927-905                                        | 920-902   | 952-937   | 944-939   |
| Ti-O-Ti | 436-421                                        | 435-416   | 440-422   | 435-423   |

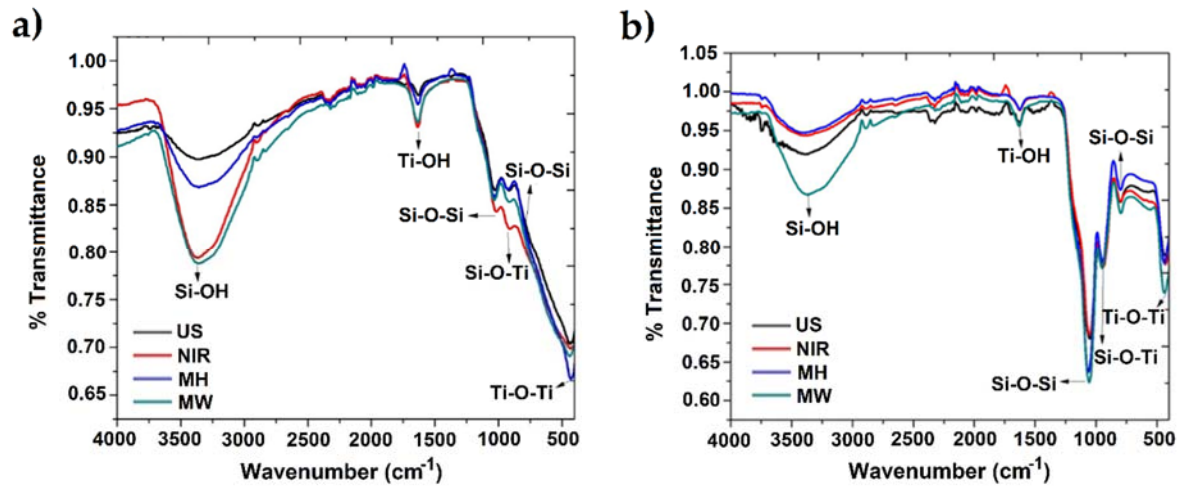

**2.- Figure 1** FTIR of SiO<sub>2</sub>-TiO<sub>2</sub> for a) 1:4, b) 4:1 molar ratio catalyst obtained by MH, US, NIR and MW.

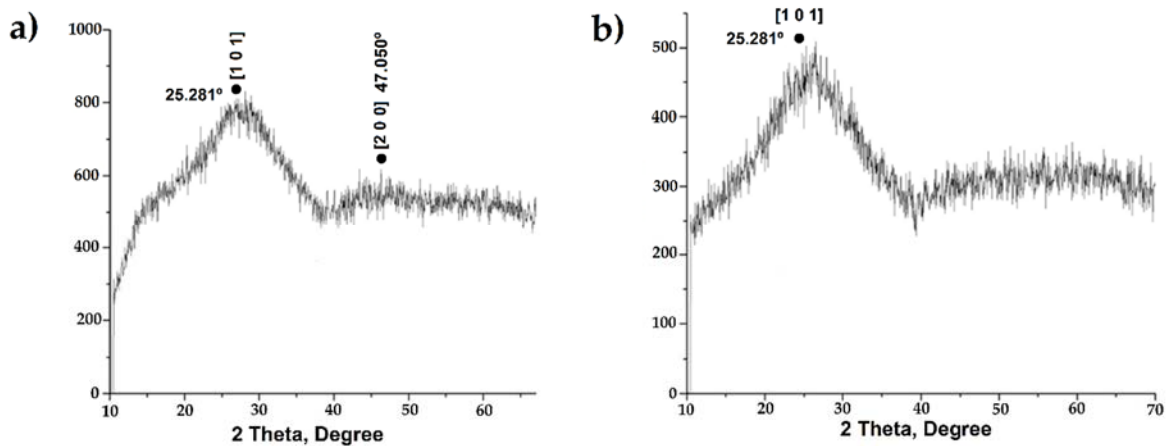

**3.- Figure 2** Diffractograms of SiO<sub>2</sub>-TiO<sub>2</sub> for a) 1:1, b) 4:1 molar ratio catalyst.

4.-

**Table 2** Band gap energy values calculated from DRS-UV-vis spectra

| Molar ratio<br>SiO <sub>2</sub> -TiO <sub>2</sub> | MH                         | NIR     | US      | MW      |
|---------------------------------------------------|----------------------------|---------|---------|---------|
|                                                   | λ (nm)/E <sub>g</sub> (eV) |         |         |         |
| 1:1                                               | 368/3.3                    | 363/3.4 | 378/3.2 | 375/3.3 |
| 1:2                                               | 380/3.2                    | 364/3.4 | 372/3.3 | 370/3.3 |
| 1:4                                               | 377/3.3                    | 375/3.3 | 381/3.2 | 382/3.2 |
| 2:1                                               | 360/3.4                    | 359/3.4 | 358/3.4 | 361/3.4 |
| 4:1                                               | 355/3.5                    | 360/3.4 | 366/3.4 | 361/3.4 |

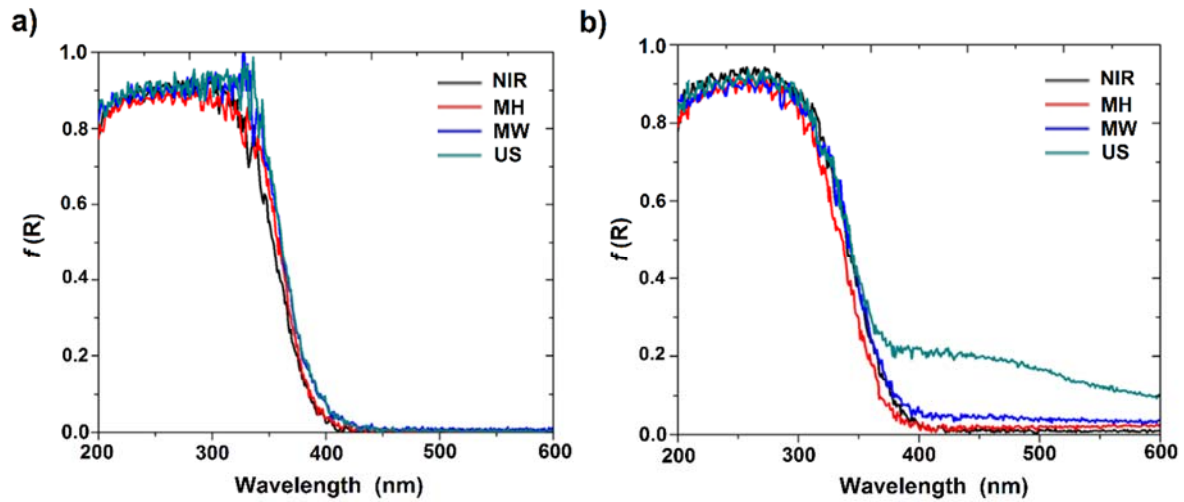

5.- **Figure 3** Curves of Kubelka-Munk of SiO<sub>2</sub>-TiO<sub>2</sub> for a) 1:4, b) 4:1 molar ratio catalyst.

6.- Determination of band gap energy as function of Kubelka-Munk method.

$$E_g = \frac{hc}{\lambda_g}$$

$$E_g = \frac{(4.09 \times 10^{-15} \text{ eV}) \left(3 \times 10^{17} \frac{\text{nm}}{\text{s}}\right)}{\lambda_g}$$

$$E_g \text{ (eV)} = \left(\frac{1226.2}{\lambda_g}\right)$$

# MH

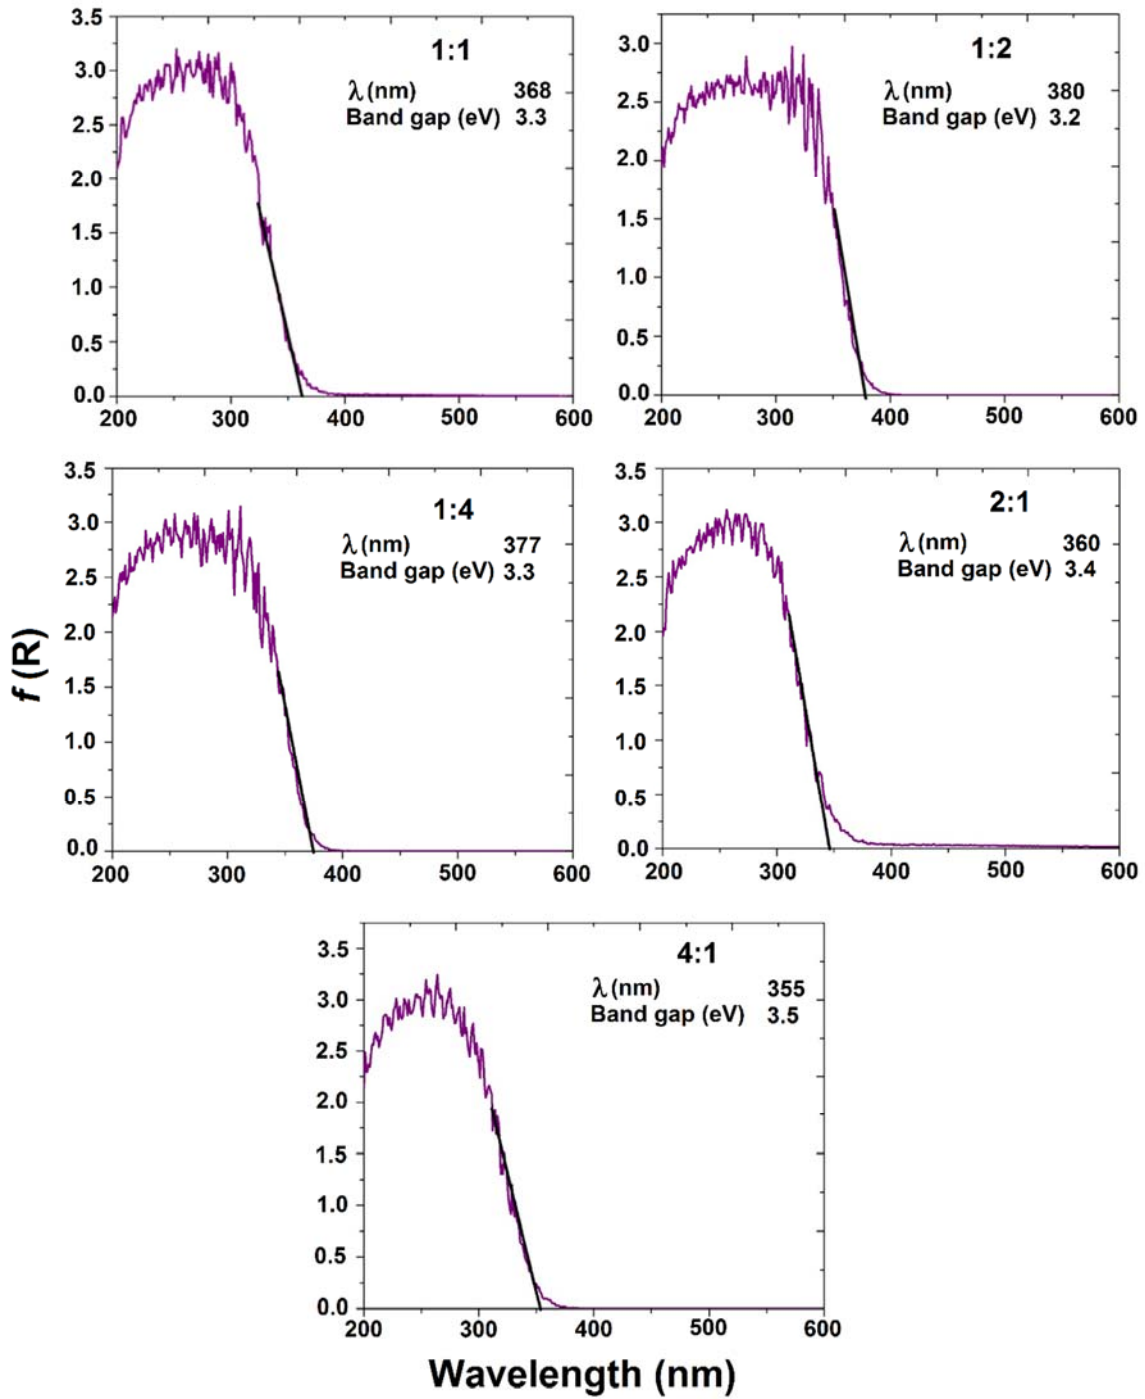

# NIR

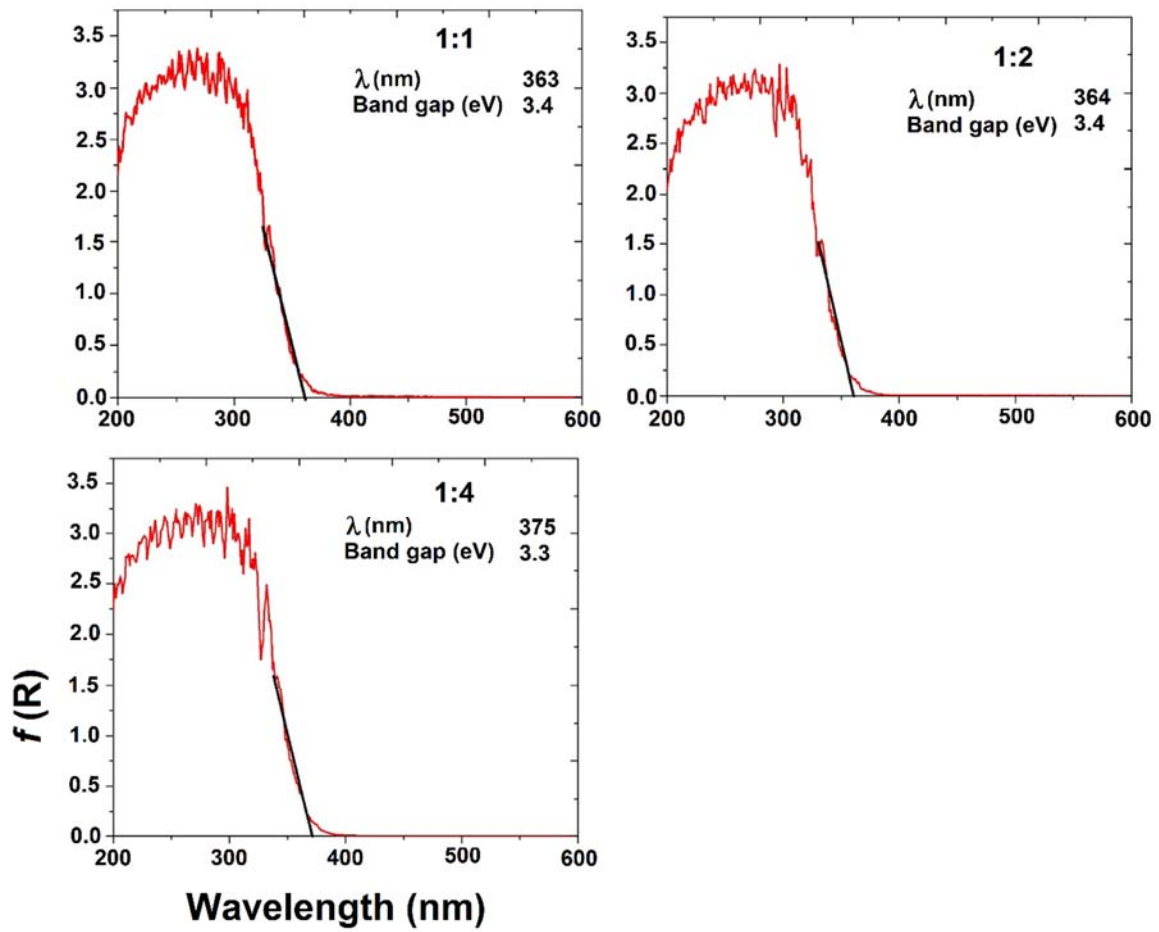

# US

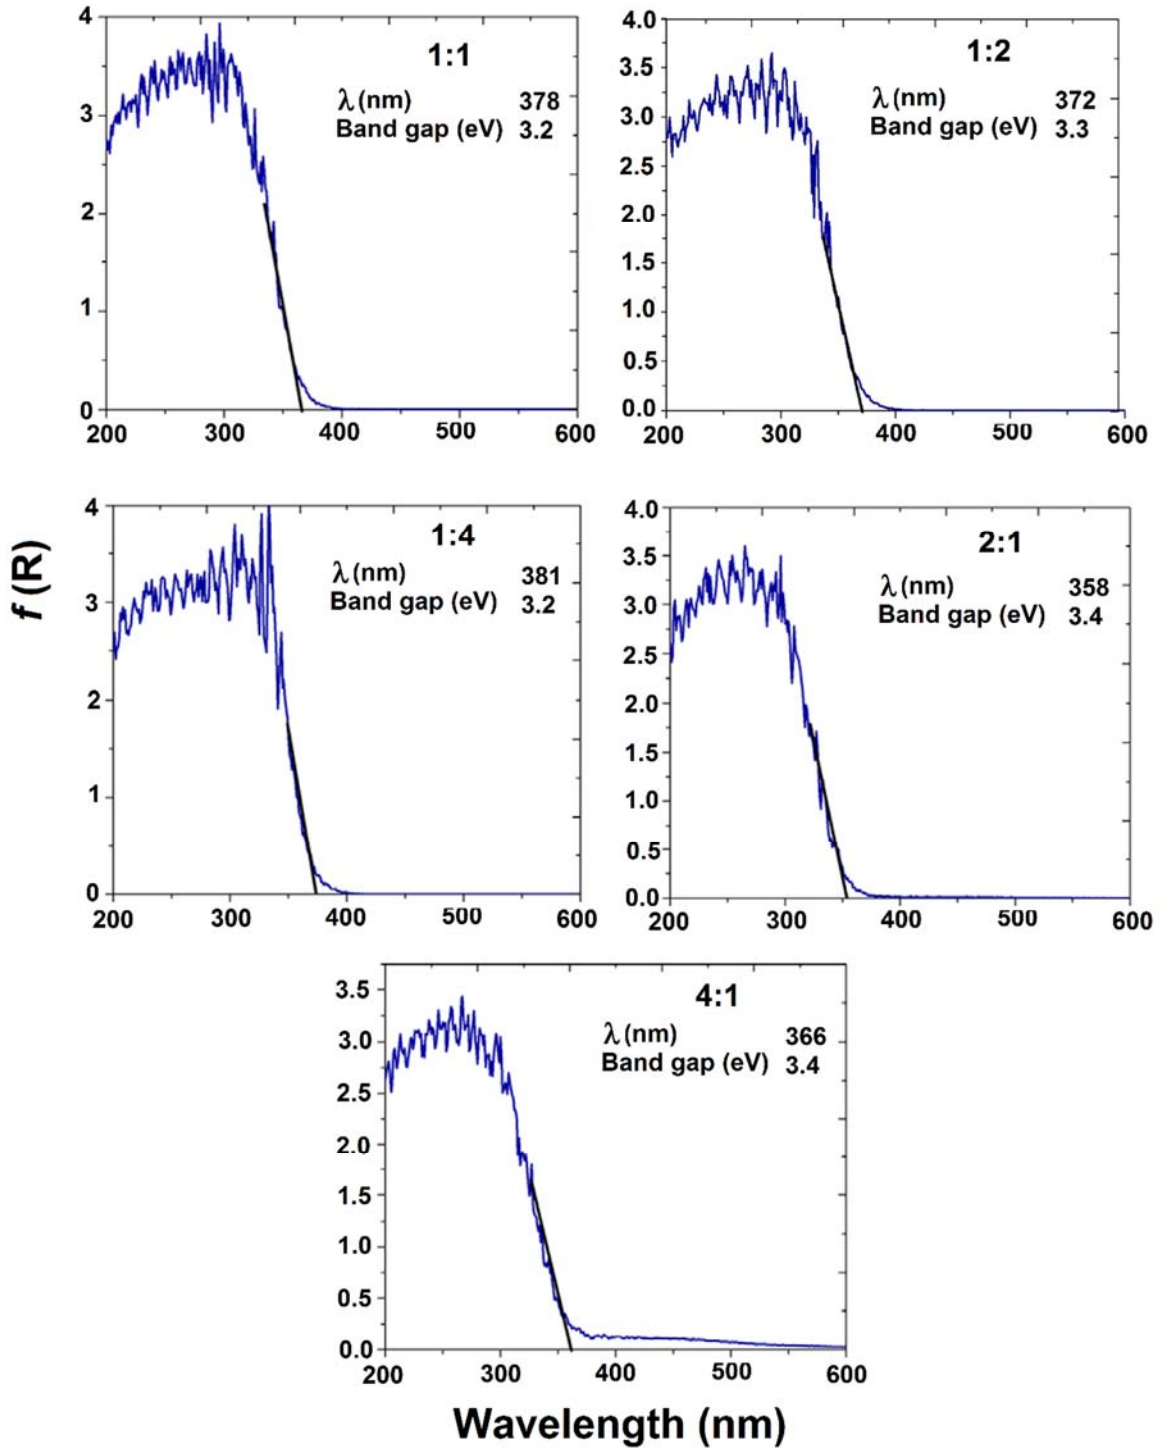

# MW

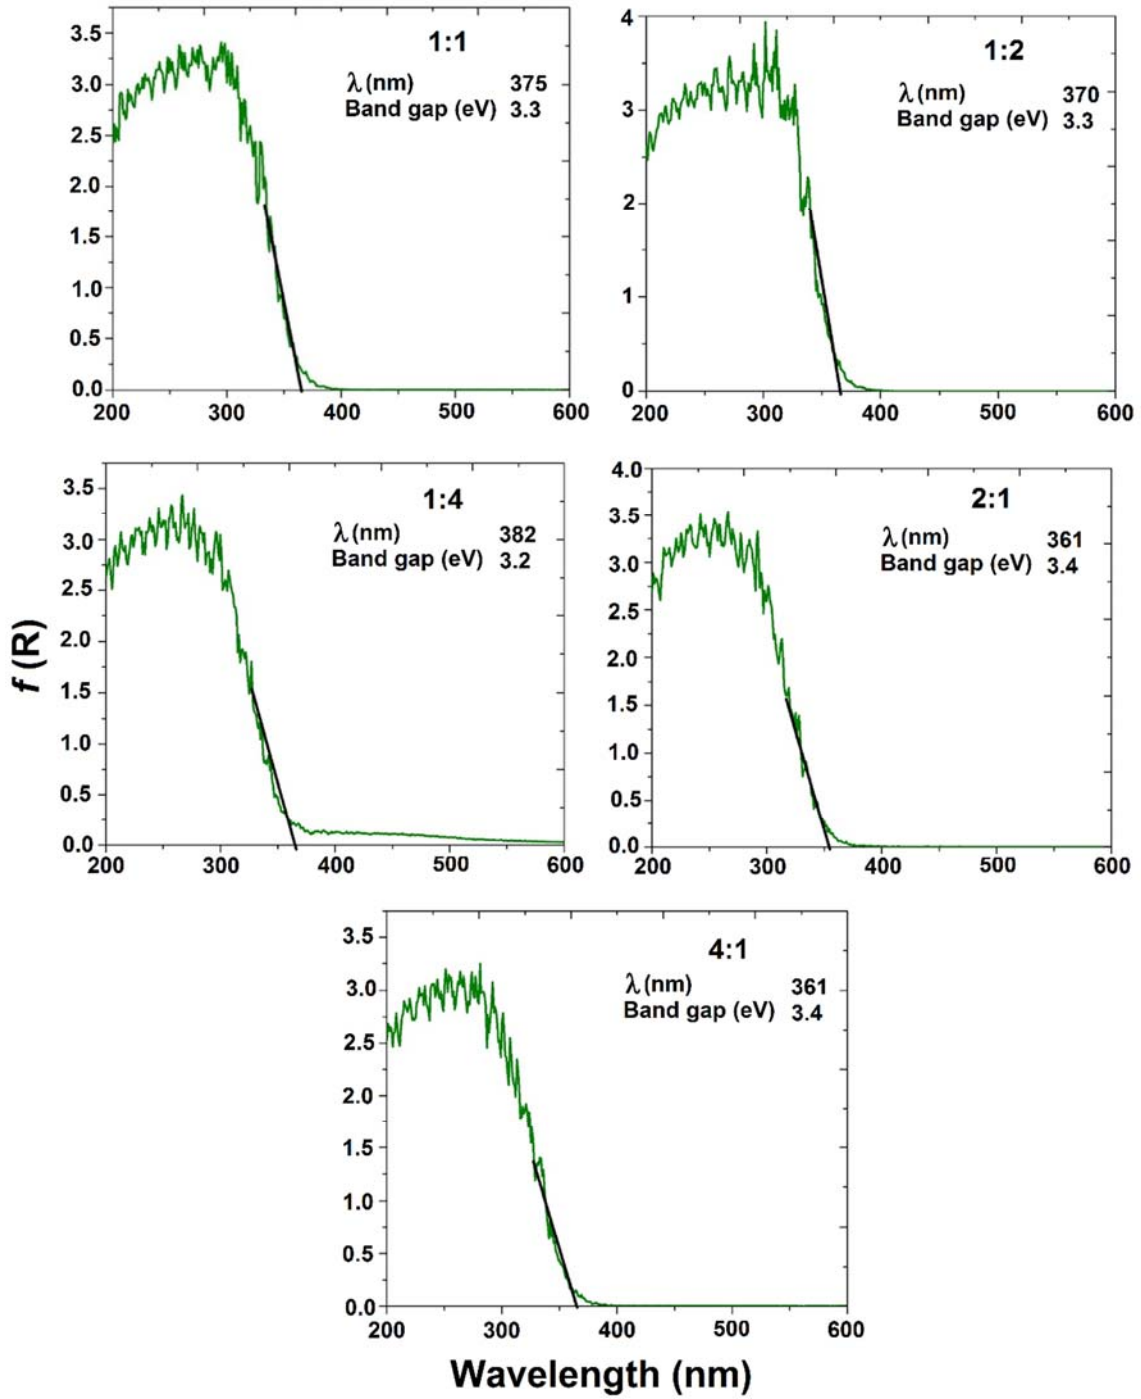

Supplement: d0ra07569h1.pdf [file d0ra07569h1.pdf]
